# Supplementary material for: RETRACTED: KRAS Activation in Gastric Adenocarcinoma Stimulates Epithelial-to-Mesenchymal Transition to Cancer Stem–Like Cells and Promotes Metastasis
Source: Oxford University Press journal article supplement (doi:10.1158/1541-7786.mcr-19-0077), 2019-06-19
Supplement: 15417786mcr190077-sup-216001_2_supp_5553567_ps9w1v.docx [file 15417786mcr190077-sup-216001_2_supp_5553567_ps9w1v.docx]

Supplementary Table 1. Clinicopathologic characteristics of patients whose tumor samples were included in the tissue microarray (Figure 2).

|  | n | % |
| --- | --- | --- |
| Age (years)a | 63.9 ± 11.1 |  |
| Sex |  |  |
| Male | 90 | 78.3 |
| Female | 25 | 21.7 |
| Body mass index (kg/m2)* | 22.2 ± 3.6 |  |
| Type of surgery |  |  |
| Distal gastrectomy | 44 | 38.3 |
| Total gastrectomy | 69 | 60.0 |
| Proximal gastrectomy | 2 | 1.7 |
| Tumor size (cm)* | 5.1 ± 1.9 |  |
| Tumor location |  |  |
| Upper third | 50 | 43.5 |
| Middle third | 22 | 19.1 |
| Lower third | 43 | 37.4 |
| Differentiation type |  |  |
| Differentiated | 39 | 33.9 |
| Undifferentiated | 76 | 66.1 |
| No. of LNs examined* | 39.6 ± 15.3 |  |
| Vascular invasion |  |  |
| Present | 45 | 39.1 |
| Absent | 70 | 60.9 |
| Perineural invasion |  |  |
| Present | 38 | 33.0 |
| Absent | 77 | 67.0 |
| T status |  |  |
| T1 | 4 | 3.5 |
| T2 | 11 | 9.6 |
| T3 | 47 | 40.8 |
| T4 | 53 | 46.1 |
| N status |  |  |
| N0 | 14 | 12.2 |
| N1 | 22 | 19.1 |
| N2 | 34 | 29.6 |
| N3a | 34 | 29.6 |
| N3b | 11 | 9.5 |
| AJCC stage |  |  |
| I | 5 | 4.3 |
| II | 30 | 26.1 |
| III | 80 | 69.6 |
